# Supplementary material for: An Overview of the Use of Genotyping Techniques for Assessing Genetic Diversity in Local Farm Animal Breeds
Source: MDPI journal article supplement (doi:10.3390/ani11072016), 2021-07-06
Supplement: s1 [file s1]

Table S1: Journals searched for suitable studies investigating genetic diversity based on genotyping of local farm animal breeds using the keywords "diversity" and "local breed" by Dec. 1, 2020.

---

Livestock Science  
Journal of Animal Science  
Animal Production  
BMC Genetics  
Frontiers in Genetics  
Global Ecology and Conservation  
Reproduction in Domestic Animals  
Diversity  
Genetics Selection Evolution  
Animal Genetic Resources  
Animal Genetics  
Animal Science Journal  
Genetics  
Genome Research  
Genetics Research  
Heredity  
Journal of Animal Breeding and Genetics  
Global Journal of Animal Breeding and Genetics  
International Journal of Animal Breeding and Genetics  
Journal of Dairy Science  
Genetic Resources  
PlosOne  
Conservation Biology

---
