# Supplementary material for: An Overview of the Use of Genotyping Techniques for Assessing Genetic Diversity in Local Farm Animal Breeds
Source: MDPI journal article supplement (doi:10.3390/ani11072016), 2021-07-06
Supplement: s1 [file s1]

Table S2: Citations of mentioned software programs suitable for assessing genetic diversity parameters

| Program              | Authors/Citation                                                                                                                                                                                                                                                                                                                                                                                                                                 |
|----------------------|--------------------------------------------------------------------------------------------------------------------------------------------------------------------------------------------------------------------------------------------------------------------------------------------------------------------------------------------------------------------------------------------------------------------------------------------------|
| Admixture            | Alexander, D.H.; Novembre, J.; Lange, K. Fast model-based estimation of ancestry in unrelated individuals. <i>Genome Research</i> <b>2009</b> , <i>19</i> , 1655-1664, doi:10.1101/gr.094052.109.                                                                                                                                                                                                                                                |
| Adze                 | Szpiech, Z. A.; Jakobsson, M.; Rosenberg, N. A. ADZE: a rarefaction approach for counting alleles private to combinations of populations. <i>Bioinformatics</i> <b>2008</b> , <i>24</i> , 2498-2504, doi:10.1093/bioinformatics/btn478                                                                                                                                                                                                           |
| Arlequin             | Excoffier, L.; Lischer, H.E. L. Arlequin suite ver 3.5: A new series of programs to perform population genetics analyses under Linux and Windows. <i>Molecular Ecology Resources</i> <b>2010</b> , <i>10</i> , 564-567, doi:10.1111/j.1755-0998.2010.02847.x.                                                                                                                                                                                    |
| BAPS                 | Corander, J.; Marttinen, P. Bayesian identification of admixture events using multi-locus molecular markers. <i>Molecular Ecology</i> <b>2006</b> , <i>15</i> , 2833-2843, doi:10.1111/j.1365-294X.2006.02994.x (Please note: For the calculation of other parameters different citations must be given.)                                                                                                                                        |
| BioPerl              | Stajich, J. E.; Block, D.; Boulez, K.; Brenner, S. E.; Chervitz, S. A.; Dagdigian, C.; Fuellen, G.; Gilbert, J. G.; Korf, I.; Lapp, H.; Lehväslaiho, H.; Matsalla, C.; Mungall, C. J.; Osborne, B. I.; Pocock, M. R.; Schattner, P.; Senger, M.; Stein, L. D.; Stupka, E.; Wilkinson, M. D.; Birney, E. The Bioperl toolkit: Perl modules for the life sciences. <i>Genome Research</i> <b>2002</b> , <i>12</i> , 1611-8, doi: 10.1101/gr.361602 |
| Cervus               | Kalinowski, S.T.; Taper, M.L.; Marshall, T.C. Revising how the computer program CERVUS accommodates genotyping error increases success in paternity assignment. <i>Molecular Ecology</i> <b>2007</b> , <i>16</i> , 1099-1106, doi: 10.1111/j.1365-294X.2007.03089.x.                                                                                                                                                                             |
| Cipres               | Miller, M. A.; Pfeiffer, W.; Schwartz, T. Creating the CIPRES Science Gateway for inference of large phylogenetic trees. Proceedings of the Gateway Computing Environments Workshop (GCE), 14 Nov. 2010, New Orleans, LA, 1- 8.                                                                                                                                                                                                                  |
| CLUMPP               | Jakobsson, M.; Rosenberg, N.A. CLUMPP: a cluster matching and permutation program for dealing with label switching and multimodality in analysis of population structure. <i>Bioinformatics</i> <b>2007</b> , <i>23</i> , 1801-1806, doi: 10.1093/bioinformatics/btm233.                                                                                                                                                                         |
| DARwin               | Perrier, X.; Jacquemoud-Collet, J.P. (2006) DARwin software <a href="http://darwin.cirad.fr/">http://darwin.cirad.fr/</a>                                                                                                                                                                                                                                                                                                                        |
| DISPAN               | Copyright 1993 by Tatsuya Ota and the Pennsylvania State University                                                                                                                                                                                                                                                                                                                                                                              |
| Distruct             | Rosenberg, N.A. DISTRUCT: a program for the graphical display of population structure. <i>Molecular Ecology Notes</i> , <b>2004</b> , <i>4</i> , 137-138, doi: 10.1046/j.1471-8286.2003.00566.x.                                                                                                                                                                                                                                                 |
| DnaSP                | Rozas, J.; Ferrer-Mata, A.; Sánchez-DelBarrio, J. C.; Guirao-Rico, S.; Librado, P.; Ramos-Onsins, S. E.; Sánchez-Gracia, A. DnaSP 6: DNA Sequence Polymorphism Analysis of Large Datasets. <i>Molecular Biology and Evolution</i> <b>2017</b> , <i>34</i> , 3299-3302, doi:10.1093/molbev/msx248                                                                                                                                                 |
| Eigensoft/Eigenstrat | Price, A.; Patterson, N. J.; Plenge, R. M.; Weinblatt, M. E.; Shadick, N. A.; Reich, D. Principal components analysis corrects for stratification in genome-wide association studies. <i>Nature Genetics</i> <b>2006</b> , <i>38</i> , 904-909, doi:10.1038/ng1847                                                                                                                                                                               |

|                                  |                                                                                                                                                                                                                                                                                                                                                                                                                                                                    |
|----------------------------------|--------------------------------------------------------------------------------------------------------------------------------------------------------------------------------------------------------------------------------------------------------------------------------------------------------------------------------------------------------------------------------------------------------------------------------------------------------------------|
|                                  | Patterson, N.; Price, A.; Reich, D. Population Structure and Eigenanalysis. <i>Plos Genetics</i> <b>2006</b> , <i>2</i> , doi:10.1371/journal.pgen.0020190                                                                                                                                                                                                                                                                                                         |
| fastSTRUCTURE                    | Raj, A.; Stephens, M.; Pritchard, J. K. fastSTRUCTURE: Variational Inference of Population Structure in Large SNP Data Sets. <i>Genetics</i> <b>2014</b> , <i>197</i> , 573–589, doi:10.1534/genetics.114.164350                                                                                                                                                                                                                                                   |
| FreeNA                           | Chapuis, M.-P.; Estoup, A. Microsatellite null alleles and estimation of population differentiation. <i>Molecular Biology and Evolution</i> <b>2007</b> , <i>24</i> , 621–631, doi:10.1093/molbev/msl191.                                                                                                                                                                                                                                                          |
| FSTAT                            | Goudet, J. FSTAT (Version 1.2): A Computer Program to Calculate F-Statistics. <i>Journal of Heredity</i> <b>1995</b> , <i>86</i> , 485–486, doi:10.1093/oxfordjournals.jhered.a111627.                                                                                                                                                                                                                                                                             |
| GCTA                             | Yang, J.; Lee, S. H.; Goddard, M. E.; Visscher, P. M. GCTA: a tool for genome-wide complex trait analysis. <i>American Journal of Human Genetics</i> <b>2011</b> , <i>88</i> , 76–82, doi:10.1016/j.ajhg.2010.11.011                                                                                                                                                                                                                                               |
| GDA                              | Designed by Paul O. Lewis and Dmitri Zaykin to accompany the book: Weir, B. S. 1996. Genetic Data Analysis. 2nd ed. Sinauer Associates, Sunderland, Massachusetts. 376 pages.                                                                                                                                                                                                                                                                                      |
| GenAlEx                          | Peakall, R.; Smouse, P.E. GENALEX 6: genetic analysis in Excel. Population genetic software for teaching and research. <i>Molecular Ecology Notes</i> <b>2006</b> , <i>6</i> , 288–295, doi:10.1111/j.1471-8286.2005.01155.x.<br>Peakall, R.; Smouse, P.E. GenAlEx 6.5: genetic analysis in Excel. Population genetic software for teaching and research-an update. <i>Bioinformatics</i> <b>2012</b> , <i>28</i> , 2537–2539, doi: 10.1093/bioinformatics/bts460. |
| Genepop                          | Raymond, M.; Rousset, F. GENEPOP (version 1.2): population genetics software for exact tests and ecumenicism. <i>Journal of Heredity</i> , <b>1995</b> , <i>86</i> , 248–249, doi:10.1093/oxfordjournals.jhered.a111573.<br>Rousset, F. Genepop'007: a complete reimplementation of the Genepop software for Windows and Linux. <i>Mol. Ecol. Resources</i> <b>2008</b> , <i>8</i> , 103–106, doi:10.1111/j.1471-8286.2007.01931.x.                                |
| Genetix                          | Belkhir K., Borsa P., Chikhi L., Raufaste N. & Bonhomme F. 1996–2004 GENETIX 4.05, logiciel sous Windows TM pour la génétique des populations. Laboratoire Génome, Populations, Interactions, CNRS UMR 5000, Université de Montpellier II, Montpellier (France)                                                                                                                                                                                                    |
| Golden Helix SNP Variation Suite | Bozeman, MT: Golden Helix, Inc. Available from <a href="http://www.goldenhelix.com">http://www.goldenhelix.com</a>                                                                                                                                                                                                                                                                                                                                                 |
| hapFLK                           | Fariello, M. I.; Boitard, S.; Naya, H.; SanCristobal, M.; Servin, B. Detecting Signatures of Selection Through Haplotype Differentiation Among Hierarchically Structured Populations. <i>Genetics</i> <b>2013</b> , <i>193</i> , 929–941, doi: 10.1534/genetics.112.147231                                                                                                                                                                                         |
| Haploview                        | Barrett, J. C.; Fry, B.; Maller, J.; Daly, M. J. Haploview: analysis and visualization of LD and haplotype maps. <i>Bioinformatics</i> <b>2005</b> , <i>21</i> , 263–5, doi:10.1093/bioinformatics/bth457                                                                                                                                                                                                                                                          |
| HP-Rare                          | Kalinowski, S.T. HP-Rare 1.0 : a computer program for performing rarefaction on measures of allelic richness. <i>Molecular Ecology Notes</i> <b>2005</b> , <i>5</i> , 187–189, doi:10.1111/j.1471-8286.2004.00845.x                                                                                                                                                                                                                                                |
| Leadmix                          | Wang, J. Maximum Likelihood Estimation of Admixture Proportions from Genetic Data. <i>Genetics</i> <b>2003</b> , <i>164</i> , 747–765                                                                                                                                                                                                                                                                                                                              |
| Mega                             | Tamura, K.; Stecher, G.; Kumar, S. MEGA11: Molecular Evolutionary Genetics Analysis version 11. <i>Molecular Biology and Evolution</i> <b>2021</b> , <i>23</i> , doi: 10.1093/molbev/msab120 (Please note: For the indication of other versions another citation must be given).                                                                                                                                                                                   |

---

|                        |                                                                                                                                                                                                                                                                                                                                                                                                                                                                                                                           |
|------------------------|---------------------------------------------------------------------------------------------------------------------------------------------------------------------------------------------------------------------------------------------------------------------------------------------------------------------------------------------------------------------------------------------------------------------------------------------------------------------------------------------------------------------------|
| Micro-Checker          | Van Oosterhout, C.; Hutchinson, W.F.; Wills, D.P.M.; Shipley, P. micro-checker: software for identifying and correcting genotyping errors in microsatellite data. <i>Molecular Ecology Notes</i> <b>2004</b> , <i>4</i> , 535-538, doi:10.1111/j.1471-8286.2004.00684.x.                                                                                                                                                                                                                                                  |
| Microsatellite Toolkit | No actual citation available.                                                                                                                                                                                                                                                                                                                                                                                                                                                                                             |
| MolKin                 | Gutiérrez, J.P.; Royo, L.J.; Álvarez, I.; Goyache, F. MolKin v2.0: a computer program for genetic analysis of populations using molecular coancestry information. <i>Journal of Heredity</i> <b>2005</b> , <i>96</i> , 718-721, doi:10.1093/jhered/esi118                                                                                                                                                                                                                                                                 |
| MrBAYES                | Huelsenbeck, J. P.; Ronquist, F. MRBAYES: Bayesian inference of phylogeny. <i>Bioinformatics</i> <b>2001</b> , <i>17</i> , 754-755, doi:10.1093/bioinformatics/17.8.754<br>Ronquist, F.; Huelsenbeck, J. P. MRBAYES 3: Bayesian phylogenetic inference under mixed models. <i>Bioinformatics</i> <b>2003</b> , <i>19</i> , 1572-1574 doi:10.1093/bioinformatics/btg180                                                                                                                                                    |
| MVSP                   | Kovach, W.L., 2007. MVSP - A MultiVariate Statistical Package for Windows, ver. 3.1. Kovach Computing Services, Pentraeth, Wales, U.K.                                                                                                                                                                                                                                                                                                                                                                                    |
| NeESTIMATOR            | Do, C.; Waples, R. S.; Peel, D.; Macbeth, G. M.; Tillett, B. J.; Ovenden, J. R. NeEstimator V2: re-implementation of software for the estimation of contemporary effective population size (Ne) from genetic data. <i>Molecular Ecology Resources</i> <b>2014</b> , <i>14</i> , 209-214, doi:10.1111/1755-0998.12157                                                                                                                                                                                                      |
| Network                | Bandelt, H. J.; Forster, P.; Röhl, A. Median-joining networks for inferring intraspecific phylogenies. <i>Molecular Biology and Evolution</i> <b>1999</b> , <i>16</i> , 37-48, doi:10.1093/oxfordjournals.molbev.a026036                                                                                                                                                                                                                                                                                                  |
| Plink                  | Purcell, S.; Neale, B.; Todd-Brown, K.; Thomas, L.; Ferreira, M. A. R.; Bender, D.; Maller, J.; Sklar, P.; Bakker, P. I. W. de; Daly, M. J.; et al. PLINK: a tool set for whole-genome association and population-based linkage analyses. <i>American Journal of Human Genetics</i> <b>2007</b> , <i>81</i> , 559-575, doi:10.1086/519795                                                                                                                                                                                 |
| Phase                  | Stephens, M.; Smith, N. J., Donnelly, P. A new statistical method for haplotype reconstruction from population data. <i>American Journal of Human Genetics</i> <b>2001</b> , <i>68</i> , 978-989<br>Stephens, M.; Scheet, P. Accounting for decay of linkage disequilibrium in haplotype inference and missing data imputation. <i>American Journal of Human Genetics</i> <b>2005</b> , <i>76</i> , 449-462, doi:10.1086/428594 (Please note: For the calculation of other parameters different citations must be given.) |
| PHYLIP                 | Felsenstein, J. PHYLIP - Phylogeny Inference Package (Version 3.2). <i>Cladistics</i> <b>1989</b> , <i>5</i> , 164-166                                                                                                                                                                                                                                                                                                                                                                                                    |
| POPGENE                | Yeh, F.C.; Boyle, T.J.B. Population genetic analysis of co-dominant and dominant markers and quantitative traits. <i>Belgian Journal of Botany</i> <b>1997</b> , <i>129</i> , 157                                                                                                                                                                                                                                                                                                                                         |
| Populations            | Populations, 1.2.30 Copyright (C) 1999, Olivier Langella, CNRS UPR9034                                                                                                                                                                                                                                                                                                                                                                                                                                                    |
| PowerMarker            | Homepage: <a href="https://brcwebportal.cos.ncsu.edu/powermarker/index.html">https://brcwebportal.cos.ncsu.edu/powermarker/index.html</a><br>Citation information can be obtained by selecting Help How To Cite PowerMarker in the PowerMarker program.                                                                                                                                                                                                                                                                   |
| RAxML                  | Stamatakis, A. RAxML Version 8: A tool for Phylogenetic Analysis and Post-Analysis of Large Phylogenies. <i>Bioinformatics</i> <b>2014</b> , <i>30</i> , 1312-3, doi:10.1093/bioinformatics/btu033                                                                                                                                                                                                                                                                                                                        |
| SAMOVA                 | Dupanloup, I.; Schneider, S.; Excoffier, L. A simulated annealing approach to define the genetic structure of populations. <i>Molecular Ecology</i> <b>2002</b> , <i>11</i> , 2571-81, doi:10.1046/j.1365-294x.2002.01650.x                                                                                                                                                                                                                                                                                               |
| SNeP                   | Barbato, M.; Orozco-terWengel, P.; Tapio, M.; Bruford, M. W.                                                                                                                                                                                                                                                                                                                                                                                                                                                              |

---

---

|            |                                                                                                                                                                                                                                                                                                                                  |
|------------|----------------------------------------------------------------------------------------------------------------------------------------------------------------------------------------------------------------------------------------------------------------------------------------------------------------------------------|
|            | SNeP: a tool to estimate trends in recent effective population size trajectories using genome-wide SNP data. <i>Frontiers in Genetics</i> <b>2015</b> , <i>6</i> , 109, doi:10.3389/fgene.2015.00109                                                                                                                             |
| SplitsTree | Huson, D.H.; Bryant, D. Application of Phylogenetic Networks in Evolutionary Studies. <i>Molecular Biology and Evolution</i> <b>2006</b> , <i>23</i> , 254-267, doi:10.1093/molbev/msj030                                                                                                                                        |
| Structure  | Pritchard, J.K.; Stephens, M.; Donnelly, P. Inference of Population Structure Using Multilocus Genotype Data. <i>Genetics Society of America</i> 2000, <i>155</i> , 945-959                                                                                                                                                      |
| TreeMix    | Pickrell, J. K.; Pritchard, J. K. Inference of Population Splits and Mixtures from Genome-Wide Allele Frequency Data. <i>Plos Genetics</i> <b>2012</b> , <i>8</i> , doi: 10.1371/journal.pgen.1002967                                                                                                                            |
| VCFtools   | Danecek, P.; Auton, A.; Abecasis, G.; Albers, C. A.; Banks, E.; DePristo, M. A.; Handsaker, R. E.; Lunter, G.; Marth, G. T.; Sherry, S. T.; McVean, G.; Durbin, R.; 1000 Genomes Project Analysis Group. The variant call format and VCFtools. <i>Bioinformatics</i> 2011, <i>27</i> , 2156-8, doi:10.1093/bioinformatics/btr330 |

---
