# Supplementary material for: An Overview of the Use of Genotyping Techniques for Assessing Genetic Diversity in Local Farm Animal Breeds
Source: MDPI journal article supplement (doi:10.3390/ani11072016), 2021-07-06
Supplement: s1 [file s1]

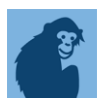

Table S3: Publicly available raw data of different local cattle, sheep, chicken, pig and goat breeds based on different genotyping techniques

| Breed/Population                    | Type of Data                                        | Source                                                                                                                                               | Reference                                                                                                                                                                                                                                                                                                                                                           |
|-------------------------------------|-----------------------------------------------------|------------------------------------------------------------------------------------------------------------------------------------------------------|---------------------------------------------------------------------------------------------------------------------------------------------------------------------------------------------------------------------------------------------------------------------------------------------------------------------------------------------------------------------|
| Black Slavonian and Turopolje pig   | Illumina PorcineSNP60                               | Dryad, <a href="https://doi.org/10.5061/dryad.wpzgmsbhq">https://doi.org/10.5061/dryad.wpzgmsbhq</a>                                                 | Lukić, B.; Ferenčaković, M.; Šalamon, D.; Čačić, M.; Orehovački, V.; Iacolina, L.; Curik, I.; Cubric-Curik, V. Conservation Genomic Analysis of the Croatian Indigenous Black Slavonian and Turopolje Pig Breeds. <i>Frontiers in Genetics</i> <b>2020</b> , <i>11</i> , 1212, doi: 10.3389/fgene.2020.00261                                                        |
| Four Chinese native pig populations | WGS <sup>1</sup>                                    | SRA database, accession no. SRP149063                                                                                                                | Qiao, R.; Li, X.; Han, X.; Wang, K.; Lv, G.; Ren, G. Population structure and genetic diversity of four Henan pig populations. <i>Animal genetics</i> <b>2019</b> , <i>50</i> , 262–265, doi: 10.1111/age.12775                                                                                                                                                     |
| Göttinger Minipig                   | WGS                                                 | ENA <sup>2</sup> , project accession PRJEB36673                                                                                                      | Reimer, C.; Ha, N.-T.; Sharifi, A. R.; Geibel, J.; Mikkelsen, L. F.; Schlather, M.; Weigend, S.; Simianer, H. Assessing breed integrity of Göttingen Minipigs. <i>BMC genomics</i> <b>2020</b> , <i>21</i> , 308, doi: 10.1186/s12864-020-6590-4                                                                                                                    |
| Six indigenous Chinese pig breeds   | SNP-data                                            | <a href="http://klab.sjtu.edu.cn/iBLUP/genotype_taihu_pigs.zip">http://klab.sjtu.edu.cn/iBLUP/genotype_taihu_pigs.zip</a>                            | Wang, Z.; Chen, Q.; Yang, Y.; Liao, R.; Zhao, J.; Zhang, Z.; Chen, Z.; Zhang, X.; Xue, M.; Yang, H.; Zheng, Y.; Wang, Q.; Pan, Y. Genetic diversity and population structure of six Chinese indigenous pig breeds in the Taihu Lake region revealed by sequencing data. <i>Animal genetics</i> <b>2015</b> , <i>46</i> , 697–701, doi: 10.1111/age.12349            |
| One native Chinese pig breed        | WGS                                                 | NCBI BioProject database, accession PRJNA639223                                                                                                      | Wu, F.; Sun, H.; Lu, S.; Gou, X.; Yan, D.; Xu, Z.; Zhang, Z.; Qadri, Q. R.; Zhang, Z.; Wang, Z.; Chen, Q.; Li, M.; Wang, X.; Dong, X.; Wang, Q.; Pan, Y. Genetic Diversity and Selection Signatures Within Diannan Small-Ear Pigs Revealed by Next-Generation Sequencing. <i>Frontiers in genetics</i> <b>2020</b> , <i>11</i> , 733, doi: 10.3389/fgene.2020.00733 |
| Three native Korean cattle breeds   | Illumina BovineSNP50 BeadChip                       | Dryad, <a href="http://dx.doi.org/10.5061/dryad.55f3s">http://dx.doi.org/10.5061/dryad.55f3s</a>                                                     | Sharma, A.; Lee, S.-H.; Lim, D.; Chai, H.-H.; Choi, B.-H.; Cho, Y. A genome-wide assessment of genetic diversity and population structure of Korean native cattle breeds. <i>BMC genetics</i> <b>2016</b> , <i>17</i> , 139, doi: 10.1186/s12863-016-0444-8                                                                                                         |
| Nine Swedish cattle breeds          | GeneSeek Genomic Profiler High-Density Bovine 150 K | Dryad, <a href="https://datadryad.org/stash/dataset/doi:10.5061/dryad.wdbrv15j4">https://datadryad.org/stash/dataset/doi:10.5061/dryad.wdbrv15j4</a> | Upadhyay, M.; Eriksson, S.; Mikko, S.; Strandberg, E.; Stålhammar, H.; Groenen, M. A. M.; Crooijmans, R. P. M. A.; Andersson, G.; Johansson, A. M. Genomic relatedness and diversity of Swedish native cattle breeds. <i>Genetics, selection, evolution</i> <b>2019</b> , <i>51</i> , 56, doi: 10.1186/s12711-019-0496-0                                            |
| Two indigenous Irish cattle breeds  | Illumina Bovine SNP50 BeadChip                      | Dryad, <a href="https://doi.org/10.5061/dryad.8fk81">https://doi.org/10.5061/dryad.8fk81</a>                                                         | Browett, S.; McHugo, G.; Richardson, I. W.; Magee, D. A.; Park, S. D. E.; Fahey, A. G.; Kearney, J. F.; Correia, C. N.; Randhawa, I. A. S.; MacHugh, D. E. Genomic Characterisation of the Indigenous Irish Kerry Cattle Breed. <i>Frontiers in genetics</i> <b>2018</b> , <i>9</i> , 51, doi:10.3389/fgene.2018.00051                                              |

|                                            |                                     |                                                                                                                                                              |                                                                                                                                                                                                                                                                                                                                                                                                                                                                                                                                                                                                             |
|--------------------------------------------|-------------------------------------|--------------------------------------------------------------------------------------------------------------------------------------------------------------|-------------------------------------------------------------------------------------------------------------------------------------------------------------------------------------------------------------------------------------------------------------------------------------------------------------------------------------------------------------------------------------------------------------------------------------------------------------------------------------------------------------------------------------------------------------------------------------------------------------|
| Two Finnish and one Siberian cattle breed  | WGS                                 | ENA, accession number PRJEB28185                                                                                                                             | Weldenegodguad, M.; Popov, R.; Pokharel, K.; Ammosov, I.; Ming, Y.; Ivanova, Z.; Kantanen, J. Whole-Genome Sequencing of Three Native Cattle Breeds Originating From the Northernmost Cattle Farming Regions. <i>Frontiers in genetics</i> <b>2018</b> , <i>9</i> , 728, doi:10.3389/fgene.2018.00728                                                                                                                                                                                                                                                                                                       |
| Two native cattle breeds from Myanmar      | BoLA-DRB3 genotyping                | ENA, accession numbers LC466585, LC466586, LC466588                                                                                                          | Giovambattista, G.; Moe, K. K.; Polat, M.; Borjigin, L.; Hein, S. T.; Moe, H. H.; Takeshima, S.-N.; Aida, Y. Characterization of bovine MHC DRB3 diversity in global cattle breeds, with a focus on cattle in Myanmar. <i>BMC genetics</i> <b>2020</b> , <i>21</i> , 95, doi: 10.1186/s12863-020-00905-8                                                                                                                                                                                                                                                                                                    |
| Five native Swedish sheep breeds           | Ovine Infinium HD SNP BeadChip      | Dryad, <a href="https://datadryad.org/stash/dataset/doi:10.5061/dryad.342">https://datadryad.org/stash/dataset/doi:10.5061/dryad.342</a>                     | Rochus, C. M.; Jonas, E.; Johansson, A. M. Population structure of five native sheep breeds of Sweden estimated with high density SNP genotypes. <i>BMC genetics</i> <b>2020</b> , <i>21</i> , 27, doi:10.1186/s12863-020-0827-8                                                                                                                                                                                                                                                                                                                                                                            |
| Five local sheep breeds from Kyrgyzstan    | Illumina OvineSNP50 BeadChip        | Dryad, <a href="https://doi.org/10.5061/dryad.37pvmcvff">https://doi.org/10.5061/dryad.37pvmcvff</a>                                                         | Deniskova, T.; Dotsev, A.; Lushihina, E.; Shakhin, A.; Kunz, E.; Medugorac, I.; Reyer, H.; Wimmers, K.; Khayatadeh, N.; Sölkner, J.; Sermyagin, A.; Zhunushev, A.; Brem, G.; Zinovieva, N. Population Structure and Genetic Diversity of Sheep Breeds in the Kyrgyzstan. <i>Frontiers in genetics</i> <b>2019</b> , <i>10</i> , 1311, doi:10.3389/fgene.2019.01311                                                                                                                                                                                                                                          |
| Three Belgian sheep breeds                 | Illumina OvineSNP50 beadchip        | Figshare, doi: 10.6084/m9.figshare.11322842                                                                                                                  | Meyermans, R.; Gorssen, W.; Wijnrocx, K.; Lenstra, J. A.; Vellema, P.; Buys, N.; Janssens, S. Unraveling the genetic diversity of Belgian Milk Sheep using medium-density SNP genotypes. <i>Animal genetics</i> <b>2020</b> , <i>51</i> , 258–265, doi: 10.1111/age.12891                                                                                                                                                                                                                                                                                                                                   |
| Five Ethiopian sheep populations           | Illumina Ovine Infinium HD BeadChip | Animal Genome Databases, <a href="https://www.animalgenome.org/repository/pub/KORE2017.1122/">https://www.animalgenome.org/repository/pub/KORE2017.1122/</a> | Edea, Z.; Dessie, T.; Dadi, H.; Do, K.-T.; Kim, K.-S. Genetic Diversity and Population Structure of Ethiopian Sheep Populations Revealed by High-Density SNP Markers. <i>Frontiers in genetics</i> <b>2017</b> , <i>8</i> , 218, doi: 10.3389/fgene.2017.00218                                                                                                                                                                                                                                                                                                                                              |
| Nine indigenous Arabian sheep breeds       | Illumina OvineSNP50 BeadChip        | <a href="http://widde.toulouse.inra.fr/widde/">http://widde.toulouse.inra.fr/widde/</a>                                                                      | Eydivandi, S.; Sahana, G.; Momen, M.; Moradi, M. H.; Schönherz, A. A. Genetic diversity in Iranian indigenous sheep vis-à-vis selected exogenous sheep breeds and wild mouflon. <i>Animal genetics</i> <b>2020</b> , <i>51</i> , 772–787, doi:10.1111/age.12985                                                                                                                                                                                                                                                                                                                                             |
| 144 worldwide distributed goat populations | Illumina GoatSNP50 BeadChip         | Dryad, <a href="https://doi.org/10.5061/dryad.v8g21pt">https://doi.org/10.5061/dryad.v8g21pt</a>                                                             | Colli, L.; Milanesi, M.; Talenti, A.; Bertolini, F.; Chen, M.; Crisà, A.; Daly, K. G.; Del Corvo, M.; Guldbrandtsen, B.; Lenstra, J. A.; Rosen, B. D.; Vajana, E.; Catillo, G.; Joost, S.; Nicolazzi, E. L.; Rochat, E.; Rothschild, M. F.; Servin, B.; Sonstegard, T. S.; Steri, R.; van Tassell, C. P.; Ajmone-Marsan, P.; Crepaldi, P.; Stella, A. Genome-wide SNP profiling of worldwide goat populations reveals strong partitioning of diversity and highlights post-domestication migration routes. <i>Genetics Selection Evolution</i> <b>2018</b> , <i>50</i> , 58, doi: 10.1186/s12711-018-0422-x |

---

|                                         |                                                |                                                                                                                                                              |                                                                                                                                                                                                                                                                                                                                                                                                                                                                 |
|-----------------------------------------|------------------------------------------------|--------------------------------------------------------------------------------------------------------------------------------------------------------------|-----------------------------------------------------------------------------------------------------------------------------------------------------------------------------------------------------------------------------------------------------------------------------------------------------------------------------------------------------------------------------------------------------------------------------------------------------------------|
| Seven local Spanish goat breeds         | Illumina GoatSNP50 Bead-Array                  | Deposited in the GoatAdaptMap database                                                                                                                       | Manunza, A.; Noce, A.; Serradilla, J. M.; Goyache, F.; Martínez, A.; Capote, J.; Delgado, J. V.; Jordana, J.; Muñoz, E.; Molina, A.; Landi, V.; Pons, A.; Balteanu, V.; Traoré, A.; Vidilla, M.; Sánchez-Rodríguez, M.; Sánchez, A.; Cardoso, T. F.; Amills, M. A genome-wide perspective about the diversity and demographic history of seven Spanish goat breeds. <i>Genetics Selection Evolution</i> <b>2016</b> , <i>48</i> , 52, 10.1186/s12711-016-0229-6 |
| Seven goat breeds from Pakistan         | 50K Illumina BeadChip                          | Animal Genome Databases, <a href="https://www.animalgenome.org/repository/pub/CAAS2017.0629/">https://www.animalgenome.org/repository/pub/CAAS2017.0629/</a> | Kumar, C.; Song, S.; Dewani, P.; Kumar, M.; Parkash, O.; Ma, Y.; Malhi, K. K.; Yang, N.; Mwacharo, J. M.; He, X.; Jiang, L. Population structure, genetic diversity and selection signatures within seven indigenous Pakistani goat populations. <i>Animal genetics</i> <b>2018</b> , <i>49</i> , 592–604, doi: 10.1111/age.12722                                                                                                                               |
| 15 Chinese chicken populations          | 600K Affymetrix Axiom Chicken Genotyping Array | <a href="https://figshare.com/s/ef1bbb60078f2f08aa">https://figshare.com/s/ef1bbb60078f2f08aa</a>                                                            | Zhang, J.; Nie, C.; Li, X.; Ning, Z.; Chen, Y.; Jia, Y.; Han, J.; Wang, L.; Lv, X.; Yang, W.; Qu, L. Genome-Wide Population Genetic Analysis of Commercial, Indigenous, Game, and Wild Chickens Using 600K SNP Microarray Data. <i>Frontiers in genetics</i> <b>2020</b> , <i>11</i> , doi: 10.3389/fgene.2020.543294                                                                                                                                           |
| Three Chinese indigenous chicken breeds | WGS                                            | ENA, accession number PRJEB27583                                                                                                                             | Zhang, M.; Han, W.; Tang, H.; Li, G.; Zhang, M.; Xu, R.; Liu, Y.; Yang, T.; Li, W.; Zou, J.; Wu, K. <i>BMC genomics</i> <b>2018</b> , <i>19</i> , 598, doi:10.1186/s12864-018-4973-6                                                                                                                                                                                                                                                                            |

---

<sup>1</sup>European Nucleotide Archive <sup>2</sup>Whole genome sequencing

---
